# Supplementary material for: Antiferromagnetic interlayer coupling and thus induced distinct spin texture for the [LaMnO3/LaCoO3]5 superlattices
Source: Royal Society of Chemistry journal article supplement (doi:10.1039/c6nr09242j), 2017-01-01
Supplement: c6nr09242j1.pdf [file c6nr09242j1.pdf]

Supporting Information for review only

## Antiferromagnetic interlayer coupling and thus induced distinct spin texture for the $[\text{LaCoO}_3/\text{LaMnO}_3]_5$ superlattices

Jing Zhang, Hongrui Zhang, Xuejing Zhang, Xiangxiang Guan, Xi Shen, Deshun Hong, Hui Zhang, Banggui Liu, Richeng Yu, Baogen Shen, and Jirong Sun\*

Beijing National Laboratory for Condensed Matter & Institute of Physics, Chinese Academy of Sciences, Beijing 100190, Peoples' Republic of China

E-mail: jrsun@iphy.ac.cn

Keywords: superlattice, interlayer coupling, spin texture, lattice modulation

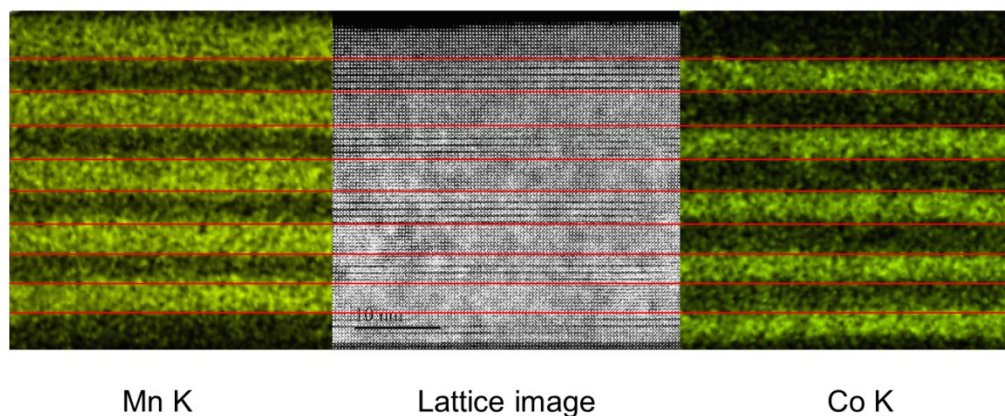

Figure S1. A comparison of the lattice image (middle) with the EDX mapping of the Mn (left) and Co (right) elements for the SLs of  $[\text{LMO}(5.7\text{nm})/\text{LCO}(4.2\text{nm})]_5$  on STO. It shows that the structural modulation (dark stripes) appears only in the LCO layer. Here 5.7nm and 4.2nm are nominal thicknesses. By directly counting the unit cell numbers the actual layer thickness can be determined. It is about 11 uc for LMO and 8 uc for LCO. Solid lines are guides for the eye.

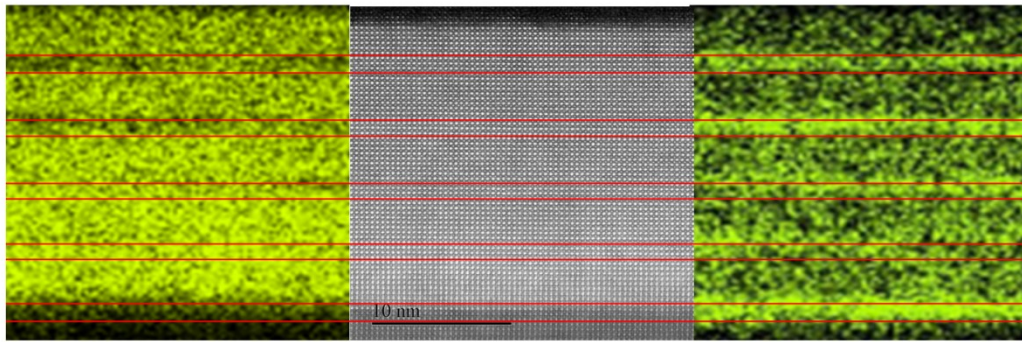

Mn K

Lattice image

Co K

Figure S2. A comparison of the lattice image (middle) with the EDX mapping of the Mn (left) and Co (right) elements for the SLs of  $[\text{LMO}(5.7\text{nm})/\text{LCO}(2.1\text{nm})]_5$  on STO. It shows that the structural modulation (dark stripes) appears only in the LCO layer. Here 5.7nm and 2.1nm are nominal thicknesses. By directly counting the unit cell numbers the actual layer thickness can be determined. It is about 9uc for LMO and  $\sim 3$  uc for LCO. Since the LCO layer is too thin, no structural modulation was observed. Solid lines are guides for the eye.
